## Effects of PM<sub>2.5</sub> Air Pollutants on Cardiovascular Health in Ohio: A Secondary Data Analysis

**Peyton G. Finkle, MS, MBS<sup>1+</sup>, Jahasia W. Gillespie, MBS<sup>1+</sup>, and Brian J. Piper, PhD<sup>1,2</sup>**

<sup>1</sup>Geisinger Commonwealth School of Medicine, Scranton, PA 18509

<sup>2</sup>Center of Pharmacy Innovation and Outcomes, Geisinger Precision Health Center, Forty Fort, PA 18704

<sup>+</sup>Master of Biomedical Science Program

Correspondence: Pfinkle@som.geisinger.edu

### Abstract

**Background:** Multiple adverse health outcomes have been linked to air pollution, particularly exposure to particulate matter (PM<sub>2.5</sub>).

**Justification:** This research will help to identify the role that socioeconomic and geographical factors have in increased cardiovascular disease and cardiac events due to elevated exposure amounts of PM<sub>2.5</sub>. Minorities in the United States are more likely to have or die from cardiovascular disease and also are the majority of the occupants in low-income communities with high levels of PM<sub>2.5</sub>.

**Methods:** PM<sub>2.5</sub> pollutant concentrations were measured from 2016 to 2018 and collected by air quality monitoring equipment in Ohio. The cardiovascular disease data on adult residents of Ohio from 2016-2018 was from the National Vital Statistics System (NVSS) and the Centers for Medicare and Medicaid Services Medicare Provider Analysis and Review (MEDPAR). R programming was used to find associations between cardiovascular disease and PM<sub>2.5</sub> in Ohio. Contingency tables compared the consumption of PM<sub>2.5</sub> and the rate of heart disease mortality. Heat maps indicated areas where heart disease mortality and PM<sub>2.5</sub> concentrations were highest.

**Results:** The average PM<sub>2.5</sub> concentration in Ohio was determined to be 7.9 µG/m<sup>3</sup>. The highest PM<sub>2.5</sub> concentrations were found in Montgomery County, Ohio and the lowest were recorded in Allen County, Ohio. With increased population density, there was also an increase with PM<sub>2.5</sub> concentrations (P<0.01). The association between cardiovascular disease mortality and PM<sub>2.5</sub> rates in these counties was nonsignificant (P>0.01). It was also found that 31.8% of counties in Ohio had air monitoring while the remaining 68.2% did not have any form of it.

**Conclusion:** Knowing the risk of PM<sub>2.5</sub> levels in any neighborhood could help community members and leaders pick a more appropriate course of action. Reducing air pollutants in these areas may in turn reduce cardiovascular disease in that population, leading to better health outcomes and longevity. This research also identified gaps in air monitoring that assists in prioritizing areas that need immediate remediation.

## Introduction

**Background:** Particulate matter (PM<sub>2.5</sub>) is a combination of solid particles and liquid droplets of pollutants found in the air with a size of 2.5 micrometers or less in diameter (1). The first entry point and primary deposition of these particles is through the lungs (2). Because of their size, smaller particles can travel deeper into the lungs causing respiratory damage. Long-term exposure to PM<sub>2.5</sub> has increased, with average concentrations ranging from approximately 5 to 30 µg/m<sup>3</sup> (3). Once absorbed into the bloodstream, they can reach anywhere in the body, causing premature aging of blood vessels and contributing to a rapid buildup of calcium in the coronary artery, causing cardiovascular disease (4,5).

Recent studies have connected elevated PM<sub>2.5</sub> levels with cardiopulmonary disorders and impairments, the initiation and progression of diabetes mellitus, and poor birth outcomes (2). Fractions of PM<sub>2.5</sub> are retained in the lungs and account for roughly 96% of particles observed (1). Another study outlined the association of PM<sub>2.5</sub> exposure and robust lung inflammation causing vascular remodeling, as well as exacerbated transition from left ventricular failure to right ventricular hypertrophy (6). Findings suggested that air quality was a critical factor in overall heart failure progression by regulating lung inflammation and remodeling (6). Two particularly vulnerable groups are women and children. PM<sub>2.5</sub> has been linked to neonatal and post neonatal mortality, premature births, and acute respiratory infections (6,7).

According to the CDC, cardiovascular disease is the leading cause of death in the United States (U.S.) (4,8). Approximately 15 million Americans were diagnosed with asthma, with around 5,000 dying annually (9). Other studies have identified air pollution as a large environmental contributor to health outcomes not only in the U.S., but globally as well (10). Air pollution has been

repeatedly associated with higher cardiovascular morbidity and mortality (10). Numerous studies have linked elevated exposure of PM<sub>2.5</sub> to adverse health effects such as cardiovascular disease and birth complications (11,12). Many investigations associate the relationship between the acquisition and the mechanisms in which PM<sub>2.5</sub> leads to adverse effects in the body (12,13). However, there are not many studies relating the geographic locations of landfills, manufacturing plants, and other air pollutant sources near low-income communities to the increased rate of acquisition of cardiovascular disease and asthma, resulting from elevated PM<sub>2.5</sub> (14).

Our primary objective was to determine if socioeconomic or geographic factors contribute to the acquisition of asthma and cardiovascular disease in low-income communities. Through the use of spatio-temporal models, PM<sub>2.5</sub> can be compared with socioeconomic position and racial composition (15). Low income, minority communities, including African Americans, Asians, and Hispanics are more likely to develop cardiovascular disease and other respiratory related diseases due to high PM<sub>2.5</sub> level exposure (15,16). Despite the wide demographic within low-income communities, African Americans have exhibited higher rates of cardiovascular disease and asthma than any other ethnic background. This fact indicates that there may be factors outside of geography and socioeconomic factors that are contributing to adverse health effects resulting from PM<sub>2.5</sub> (17,18). This research may aid in the development of future communities and give birth to new laws and regulations on the placement of residential areas in areas emitting high concentrations of pollutants.

A secondary objective was to compare Franklin and Vinton County, which were differentiated by population. Franklin County held the highest population per county in the state at 1,323,807 residents, whereas Vinton County held the lowest population per county in Ohio at 12,800 residents per the 2020 census (19). Franklin

County is located in the northeastern region of the state where there is a high population density. Vinton County, however, is in the southeastern region of the state, where the population density is lower. This research examined if infrastructure growth of these counties leading to increased PM<sub>2.5</sub> trends increases with their respective populations.

The tertiary objective was to examine the completeness of the air monitoring infrastructure and capabilities across the counties in Ohio.

## Methods

**Participants:** The study population was the adult residents of Ohio whose health data was collected and reported. The inclusion criterion for this population was age (>18 years), and participants also had to be diagnosed with cardiovascular disease or experience cardiovascular disease related death (<75 years). The exclusion criteria were obesity, and the genetic acquisition of cardiovascular disease as previous research has linked cardiovascular disease to involuntary weight gain (20), genes, and specific DNA sequence variants (21). This study was approved exempt by the Geisinger Commonwealth School of Medicine IRB.

### Data Exploration & Inferential Statistics:

The goal of this research was to find associations between cardiovascular disease with the daily mean intake of PM<sub>2.5</sub> in Ohio. Using descriptive analysis in the form of contingency tables and heat maps aided to visualize the data collected and draw conclusions. Heat maps were used as a spatial representation of the magnitude of PM<sub>2.5</sub> and cardiovascular disease development and mortality rates per county. R version 4.1.2 and the Integrated development environment (IDE) R studio version 2022.02.0+443 for macOS was used to perform calculations and generate graphs.

## Results

The relationship between cardiovascular disease mortality and the daily mean PM<sub>2.5</sub> concentration was illustrated (Table 1). Among the 88 counties in Ohio, the median population density was 4 according to the rural-urban continuum code updated decennially (22). The lowest population density coefficient was 8, indicating a completely rural or less than 2,500 urban population that is adjacent to a metro area (Table 1). The counties in Ohio that fell into this category were Monroe and Vinton County. The highest population density was 1, including counties considered to be in metro areas of 1 million population or more. Of these were 20 counties in Ohio, including Franklin County, which is the county where Ohio's capital Columbus resides.

| County     | Population Density Coefficient (2013) | PM <sub>2.5</sub> Exposure 2016-2018 (µG/m <sup>3</sup> ) |      |
|------------|---------------------------------------|-----------------------------------------------------------|------|
|            |                                       | Annual average over 3 year span (µG/m <sup>3</sup> )      | IQR  |
| Adams      | 3                                     | 6.33                                                      | 0.5  |
| Allen      | 4                                     | 5.5                                                       | 0.6  |
| Ashland    | 4                                     | X                                                         | X    |
| Ashtabula  | 4                                     | X                                                         | X    |
| Athens     | 4                                     | 6.47                                                      | 0.2  |
| Auglaize   | 3                                     | X                                                         | X    |
| Belmont    | 1                                     | 7.87                                                      | 0.35 |
| Brown      | 1                                     | X                                                         | X    |
| Butler     | 2                                     | 9.67                                                      | 0.3  |
| Carroll    | 6                                     | X                                                         | X    |
| Champaign  | 3                                     | X                                                         | X    |
| Clark      | 1                                     | 8.87                                                      | 0.75 |
| Clermont   | 6                                     | 8.57                                                      | 0.45 |
| Clinton    | 4                                     | X                                                         | X    |
| Columbiana | 6                                     | X                                                         | X    |
| Coshocton  | 4                                     | X                                                         | X    |
| Crawford   | 1                                     | X                                                         | X    |
| Cuyahoga   | 6                                     | 9.3                                                       | 0.1  |
| Darke      | 4                                     | X                                                         | X    |
| Defiance   | 1                                     | X                                                         | X    |
| Delaware   | 4                                     | X                                                         | X    |
| Erie       | 1                                     | X                                                         | X    |
| Fairfield  | 6                                     | X                                                         | X    |

|            |   |       |      |
|------------|---|-------|------|
| Fayette    | 1 | X     | X    |
| Franklin   | 2 | 7.3   | 0.4  |
| Fulton     | 6 | X     | X    |
| Gallia     | 1 | X     | X    |
| Geauga     | 2 | X     | X    |
| Greene     | 6 | 7.6   | 0.4  |
| Guernsey   | 1 | X     | X    |
| Hamilton   | 4 | 9.47  | 0.3  |
| Hancock    | 6 | X     | X    |
| Hardin     | 6 | X     | X    |
| Harrison   | 6 | 7     | 0    |
| Henry      | 6 | X     | X    |
| Highland   | 1 | X     | X    |
| Hocking    | 7 | X     | X    |
| Holmes     | 4 | X     | X    |
| Huron      | 7 | X     | X    |
| Jackson    | 3 | X     | X    |
| Jefferson  | 4 | 10.57 | 0.15 |
| Knox       | 1 | X     | X    |
| Lake       | 2 | 7.47  | 0.4  |
| Lawrence   | 1 | 7.13  | 0.6  |
| Licking    | 6 | X     | X    |
| Logan      | 1 | X     | X    |
| Lorain     | 2 | 5.9   | 0.95 |
| Lucas      | 1 | 8.23  | 0.05 |
| Madison    | 2 | X     | X    |
| Mahoning   | 4 | 8.07  | 0.05 |
| Marion     | 1 | X     | X    |
| Medina     | 6 | 7.63  | 0.15 |
| Meigs      | 7 | X     | X    |
| Mercer     | 2 | X     | X    |
| Miami      | 8 | X     | X    |
| Monroe     | 2 | X     | X    |
| Montgomery | 6 | 10.63 | 3.55 |
| Morgan     | 1 | X     | X    |
| Morrow     | 4 | X     | X    |
| Muskingum  | 7 | X     | X    |
| Noble      | 4 | 5.93  | 0.15 |
| Ottawa     | 6 | X     | X    |
| Paulding   | 1 | X     | X    |
| Perry      | 1 | X     | X    |
| Pickaway   | 7 | X     | X    |
| Pike       | 2 | X     | X    |
| Portage    | 6 | 7.27  | 0.15 |
| Preble     | 6 | 8.1   | 0.75 |
| Putnam     | 3 | X     | X    |
| Richland   | 4 | X     | X    |
| Ross       | 4 | X     | X    |
| Sandusky   | 4 | X     | X    |
| Scioto     | 4 | 7.3   | 0.7  |
| Seneca     | 4 | X     | X    |
| Shelby     | 2 | X     | X    |
| Stark      | 2 | 8.93  | 0.75 |
| Summit     | 2 | 8.8   | 0.5  |
| Trumbull   | 4 | 6.77  | 1.2  |
| Tuscarawas | 1 | X     | X    |

|            |   |      |     |
|------------|---|------|-----|
| Union      | 6 | X    | X   |
| Van Wert   | 8 | X    | X   |
| Vinton     | 1 | X    | X   |
| Warren     | 4 | 8.73 | 0.3 |
| Washington | 4 | X    | X   |
| Wayne      | 6 | X    | X   |
| Williams   | 2 | X    | X   |
| Wood       | 7 | X    | X   |
| Wyandot    | 3 | X    | X   |

**Table 1.** This table depicts counties and their respective population density coefficients. Triannual averaged PM<sub>2.5</sub> concentrations are available for the counties equipped with AQI monitoring data. Interquartile ranges (IQR) were also provided for these PM<sub>2.5</sub> concentrations.

Summarizing PM<sub>2.5</sub> concentrations from 2016-2018 in Ohio, the average concentration was 7.9 µG/m<sup>3</sup>, which is 41.2 percent lower than the current recommended amount reported by the EPA, 12 µG/m<sup>3</sup> (23). To examine health effects of exposures in these counties, cardiovascular disease mortality rates for 2016-2018 were compared to PM<sub>2.5</sub> concentrations. The association between cardiovascular disease mortality and PM<sub>2.5</sub> rates in these counties was nonsignificant (P>0.01).

Three heat maps were constructed showing various magnitudes of PM<sub>2.5</sub> concentrations and cardiovascular disease complications within the counties (Figure 1). Levels varied between counties, with the highest PM<sub>2.5</sub> concentrations in Montgomery County (10.6 µG/m<sup>3</sup>), and the lowest recorded in Allen County (5.5 µG/m<sup>3</sup>) (Figure 1). The interquartile range (IQR) of PM<sub>2.5</sub> averages was 1.72 alluding to consistent PM<sub>2.5</sub> concentrations between counties. The association between population density and PM<sub>2.5</sub> was significant, indicating with increased population density there was also an increase with PM<sub>2.5</sub> concentrations (P<0.01).

To address the completeness of air quality in the state of Ohio, 31.8% of counties in Ohio had air monitoring while the remaining 68.2% did not. More than two-thirds of the state has no form of air

quality monitoring at all, meaning the “average” concentrations in Ohio are based

on less than one-third of the state’s readings.

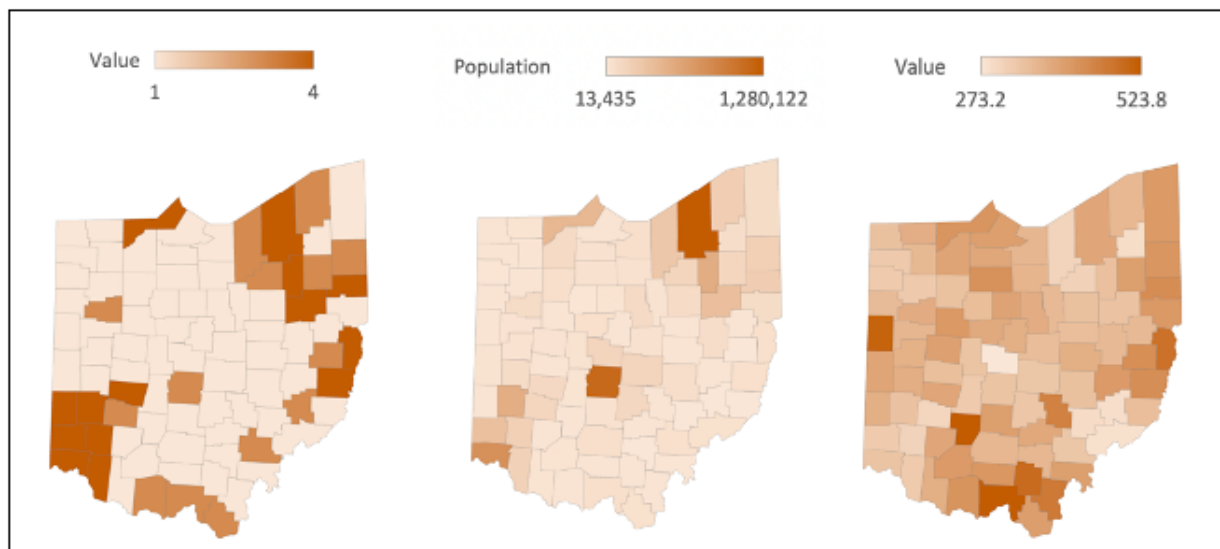

**Figure 1.** The left panel shows the average  $PM_{2.5}$  concentrations by county in Ohio from 2016 to 2018, triannually. A key above the map showcases ratings for each county on a scale from 1-4. Counties with  $PM_{2.5}$  values from 2-4  $\mu G/m^3$  were rated a 2, counties with  $PM_{2.5}$  values between 5-7  $\mu G/m^3$  were rated a 3, and counties with  $PM_{2.5}$  values 8-10  $\mu G/m^3$  were rated a 4. The middle panel shows the average population density in each county in Ohio in 2013. The right panel shows the cardiovascular disease mortality per county in Ohio averaged between 2016 and 2018.

## Discussion

Our main objective in this study was to assess the association between  $PM_{2.5}$  exposure and incidence of adverse health outcomes across counties in Ohio from 2016-2018. The average concentration of  $PM_{2.5}$  was determined to be 7.9  $\mu G/m^3$ , which is 41.2 percent lower than the current recommended amount reported by the EPA, which is 12  $\mu G/m^3$ (23). Although lower than the EPA standard, these concentrations still prove to be unhealthy for human consumption on a daily basis (2).

Our secondary objective was to compare Franklin and Vinton counties due to their variance in population. The association between population density and  $PM_{2.5}$  was significant ( $P<0.01$ ). The association between cardiovascular disease

mortality and  $PM_{2.5}$  rates in these counties was nonsignificant ( $P>0.01$ ).

The last objective of this study was to examine the completeness of the air monitoring capabilities across the counties in Ohio. The number of counties with air quality monitoring was scarce, with 31.8% of counties in Ohio having adequate air monitoring. Therefore, more than two-thirds of the state had no form of air quality monitoring at all, basing the “average” concentrations in Ohio on less than one-third of the state’s actual readings. The lack of data due to sparse equipment availability for lower income, rural, and minority communities limited overall data output for the state of Ohio as a whole. In the future, infrastructure should be created in these areas to take a fair approach to air quality monitoring. Without data to assess the quality of the air, conclusions cannot be



made as to what role it is playing in the health of the community overall.

## **Conclusion**

Despite the efforts in recent years to reduce vehicle emissions and other contributors to poor air quality, the current efforts in Ohio seem to be inadequate, especially in more rural counties (24). Several studies done in the US have indicated that asthma is more common in urban settings and in individuals who are African American, Hispanic, male, or live in lower socioeconomic areas (15,16,17,18). This furthers the need for research inclusive of socioeconomic or geographic factors to find solutions to benefit the communities who are most at risk. This research can serve as a basis for the creation of prevention strategies and mitigation techniques. For decades, there has been a call for environmental justice within the US. Residing in a low-income community is associated with physical and mental health risks (14). Hopefully with the information derived from this study areas of priority are highlighted to create a more sustainable, equitable future for Ohio (25).

## **Acknowledgements**

Theo Light, PhD,  
Oritsetosan S. Emmanuel, MBS, and  
Timerra G. Hardy, MBS, provided technical assistance.

## References

1. Gonzales T, Whalen E. Easy Breathing: A Review of the Impact of Air Quality on Pediatric Health Outcomes. *J Pediatr Health* [Internet]. 2021;36(1):57-63. Available from: <https://www-clinicalkey-com.gcsom.idm.oclc.org/#!/content/p/layContent/1-s2.0-S0891524521001899?returnurl=null&referrer=null>. doi: <https://doi.org/10.1016/j.pedhc.2021.08.002>
2. Feng S, Goa D, Liao F, Zhou F, Wang X. The Health Effects of Ambient PM<sub>2.5</sub> and Potential Mechanism. *Ecotoxicol Environ Saf*. 2016;128(1):67-74. Available from: <https://www.sciencedirect.com/science/article/abs/pii/S014765131630029X?via%3Dihub>. doi: <https://doi.org/10.1016/j.ecoenv.2016.01.030>
3. Guo C, Hoek G, Chang L, Bo Y, Lin C, Huang B, Chan T, Tam T, Lau AKH, Lao XQ, et al. Long-Term Exposure to Ambient Fine Particulate Matter (PM<sub>2.5</sub>) and Lung Function in Children, Adolescents, and Young Adults: A Longitudinal Cohort Study. *Environ. Health Perspect*. 2019;127(12):1-127008. Available from: <https://www.ncbi.nlm.nih.gov/pmc/articles/PMC6957275/>. doi: <https://doi.org/10.1289/EHP5220>
4. CDC.gov [internet]. Center for Disease Control. [updated 2022 Jan; cited 2022 Feb 18]. Available from: <https://www.cdc.gov/nchs/fastats/leading-causes-of-death.html>.
5. EPA.gov [Internet]. [Cited 2022 Mar 9]. Available from: <https://www.epa.gov/sciencematters/linking-air-pollution-and-heart-disease#:~:text=This%20study%20found%20that%20long,calcium%20in%20the%20coronary%20artery.>
6. Yue W, Tong L, Liu X, Weng X, Chen X, Wang D, Dudley SC, Weir EK, Ding W, Lu Z, Xu Y, Chen Y, et al. Short term PM<sub>2.5</sub> Exposure caused Robust Lung Inflammation, Vascular Remodeling, and Exacerbated Transition from Left Ventricular Failure to Right Ventricular Hypertrophy. *Redox Biol*. 2019;22(1):1-6. Available from: <https://www.ncbi.nlm.nih.gov/pmc/articles/PMC6411784/>. doi: <https://doi.org/10.1016/j.redox.2019.101161>
7. Zhu X, Liu Y, Chen Y, Yao C, Che Z, Cao J. Maternal Exposure to Fine Particulate Matter (PM<sub>2.5</sub>) and Pregnancy Outcomes: A Meta-analysis. *Environ Sci Pollut Res Int*. 2015;22(5):96-3383. Available from: <https://link-springer-com.gcsom.idm.oclc.org/content/pdf/10.1007/s11356-014-3458-7.pdf>. doi: <https://doi.org/10.1007/s11356-014-3458-7>
8. Bowe B, Xie Y, Yan Y, Al-Aly Z. Burden of Cause-Specific Mortality Associated With PM<sub>2.5</sub> Air Pollution in the United States. *JAMA Netw. Open*. 2019;2(11):15834-15820. Available from: <https://www.ncbi.nlm.nih.gov/pmc/articles/PMC6902821/>. doi: <https://doi.org/10.1001/jamanetworkopen.2019.15834>
9. Jaffe DH, Singer ME, Rimm AA. Air Pollution and Emergency Department Visits for Asthma among Ohio Medicaid Recipients. *Environ Res*. 2006;91(1):21–8. Available from: <https://www.sciencedirect.com/science/article/abs/pii/S001393510200004X?via%3Dihub>. doi: [https://doi.org/10.1016/S0013-9351\(02\)00004-X](https://doi.org/10.1016/S0013-9351(02)00004-X)
10. Venter ZS, Aunan K, Chowdhury S, Lelieveld J. COVID-19 Lockdowns cause Global Air Pollution Declines. *Pro. Ntl. Acad. Sci. U.S.A.*

- 2020;117(32):18990-18984.  
Available from:  
<https://www.ncbi.nlm.nih.gov/pmc/articles/PMC7430997/>. doi:  
<https://doi.org/10.1073/pnas.2006853117>
11. Sarnat, S.E. Ambient Particulate Air Pollution and Cardiac Arrhythmia in a Panel of Older Adults in Steubenville, Ohio. *Occup. Environ. Med.* 2015;63(1):700–706. Available from:  
<https://www.ncbi.nlm.nih.gov/pmc/articles/PMC2078044/>. doi:  
<https://doi.org/10.1136/oem.2006.027292>
  12. Wang C, Tu Y, Yu Z, Lulnt R. PM2.5 and Cardiovascular Diseases in the Elderly: An Overview. *J. Environ. Res. Public Health.* 2015;12(1):8197-8187. Available from:  
<https://www.ncbi.nlm.nih.gov/pmc/articles/PMC4515716/>. doi:  
<https://doi.org/10.3390%2Fijerph120708187>
  13. Zhu X, Liu Y, Chen Y, Yao C, Che Z, Cao J. Maternal exposure to fine particulate matter (PM2.5) and pregnancy outcomes: a meta-analysis. *Environ Sci Pollut Res.* 2015;22(1):3396–3383. Available from:  
<https://pubmed.ncbi.nlm.nih.gov/25163563/>. doi:  
<https://doi.org/10.1007/s11356-014-3458-7>
  14. Lamorena-Lim RB, Rosales CMF. Chemical Characterization and Behavior of Respirable Fractions of Indoor Dusts Collected Near a Landfill Facility. *Sci. Diliman.* 2016;28(1):33-17. Available from:  
[https://www.researchgate.net/publication/344440845\\_Chemical\\_Characterization\\_and\\_Behavior\\_of\\_Respirable\\_Fractions\\_of\\_Indoor\\_Dusts\\_Collected\\_Near\\_a\\_Landfill\\_Facility/link/5f75c2ba92851c14bca44af8/download](https://www.researchgate.net/publication/344440845_Chemical_Characterization_and_Behavior_of_Respirable_Fractions_of_Indoor_Dusts_Collected_Near_a_Landfill_Facility/link/5f75c2ba92851c14bca44af8/download).
  15. Brochu PJ, Yanosky JD, Paciorek CJ, Schwartz J, Chen JT, Herrick RF, et al. Particulate Air Pollution and Socioeconomic Position in Rural and Urban Areas of the Northeastern United States. *Am. J. Public Health.* 2011;101(1):S224-30. Available from:  
<https://www.ncbi.nlm.nih.gov/pmc/articles/PMC3222475/>. doi:  
<https://doi.org/10.2105/AJPH.2011.300232>
  16. Erqou S, Clougherty JE, Olafiranye O, Magnani JW, Aiyer A, Tripathy S, Kinnee E, Kip KE, Reis SE. Particulate Matter Air Pollution and Racial Differences in Cardiovascular Disease Risk. *Arterioscler. Thromb. Vasc. Bio.* 2018;38(4):942-935. Available from:  
<https://www.ncbi.nlm.nih.gov/pmc/articles/PMC5864550/>. doi:  
<https://doi.org/10.1161%2FATVBAHA.117.310305>
  17. Mikati I, Benson AF, Luben TJ, Sacks JD, Richmond-Bryant J. Disparities in Distribution of Particulate Matter Emission Sources by Race and Poverty Status. *Am. J. Public Health.* 2018;108(4)485-480. Available from:  
<https://www.ncbi.nlm.nih.gov/pmc/articles/PMC5844406/>. doi:  
<https://doi.org/10.2105%2FAJPH.2017.304297>
  18. Tessum CW, Paoletta DA, Chambliss SE, Apte JS, Hill JD, Marshall JD. PM 2.5 Polluters Disproportionately and Systemically Affect People of Color in the United States. *Sci. Adv.* 2021;7(18). Available from:  
<https://www.science.org/doi/pdf/10.1126/sciadv.abf4491>. doi:  
<https://doi.org/10.126/sciadv.abf4491>
  19. Census.gov [Internet].[updated 2021 Oct 8; cited 2022 Mar 9]. Available from:  
<https://www.census.gov/programs->



- [surveys/popest/technical-documentation/research/evaluation-estimates/2020-evaluation-estimates/2010s-cities-and-towns-total.html](#).
20. Kannel WB, D'Agostino RB, Cobb JL. Effect of weight on cardiovascular disease. *Am J Clin Nutr*. 1996;63(3):419S-422S. Available from: <https://academic.oup.com/ajcn/article/87/6/1602/4633465?login=false>. doi: <https://doi.org/10.1093/ajcn/87.6.1602>
  21. Kathiresan S, Srivastava D. Genetics of human cardiovascular disease. *Cell*. 2012 148(6):1242–57. Available from: <https://www.ncbi.nlm.nih.gov/pmc/articles/PMC3319439/>. doi: <https://doi.org/10.1016%2Fj.cell.2012.03.001>
  22. Rural-Urban Continuum Codes [Internet]. Usda.gov. [cited 2022 Apr 30]. Available from: <https://www.ers.usda.gov/data-products/rural-urban-continuum-codes.aspx>
  23. The national ambient air quality standards for particle pollution [Internet]. Epa.gov. [cited 2022 Apr 30]. Available from: [https://www.epa.gov/sites/default/files/2016-04/documents/2012\\_aqi\\_factsheet.pdf](https://www.epa.gov/sites/default/files/2016-04/documents/2012_aqi_factsheet.pdf)
  24. Data.CDC.gov [Internet]. [cited 2022 Mar 9]. Available from: <https://data.cdc.gov/Motor-Vehicle/Percentage-of-Drivers-and-Front-Seat-Passengers-We/ktph-qcgt>.
  25. Fact sheet: NRDC Fact Sheet: Climate and Health in Ohio [Internet]. Natural Resources Defense Council; 2015 [cited 2022 Mar 9]. Available from: <https://www.nrdc.org/sites/default/files/clean-power-plan-states-OH.pdf>.
